# Supplementary material
Source: publisher figshare collection journal article supplement (https://brill.figshare.com/ndownloader/files/24080099)
Supplement: Supplementary file 1 [file 24080099]

## Sheet: Sheet1
Table S2
Gene fragment	Primer code	sequence	direction	Reference
COI/tRNA/COII	Jerry	CAACATTTATTTTGATTTTTTGG	Forward	Simon et al. 1994
	Pat	TCCAATGCACTAATCTGCCATATTA	Reverse	Simon et al. 1994
	2195	TTGATTTTTTGGTCATCCAGAAGT	Forward	Simon et al. 1994
	EmbCOIF4	ACWTCAGCWACYATAATYATTGC	Forward	Miller pers. comm.
	EmbCOIIR1	CATATCTTCARTATCATTGATGAC	Reverse	Miller pers. comm.
EF1α_F2copy	haF2for1	GGGYAAAGGWTCCTTCAARTATGC	Forward	Danforth et al. 1999
	F2rev1	AATCAGCAGCACCTTTAGGTGG	Reverse	Danforth et al. 1999
	for1deg	GYATCGACAARCGTACSATYG	Forward	Magnacca and Danforth 2007
	EmphF2for	GCCTGGGTATTGGATAAGCTGAA	Forward	Sipes and Wolf 2001
	EmphF2rev	TGGATTGTTYTTRGAGTCACCAG	Reverse	Sipes and Wolf 2001
	haF2for1mel	GGGAAAAGGVTCSTTCAARTAYGC	Forward	Wright
	melfor1	GCACATCRCBYTRTGGAAGT	Forward	Wright
	melrev1	ARTACTCCVGTYTCCACACG	Reverse	Wright
	melrev3	CGAACCTGMAGRGGAAGACG	Reverse	Wright
PolII	polfor2a	AAYAARCCVGTYATGGGTATTGTRCA	Forward	Danforth et al. 2006
	polrev2a	AGRTANGARTTCTCRACGAATCCTCT	Reverse	Danforth et al. 2006
	for2	TGGGAYGSYAAAATGCCKCAACC	Forward	Danforth et al. 2006
	rev2	TTYACAGCAGTATCRATRAGACCTTC	Reverse	Danforth et al. 2006
	melF1	TTCTWRCCYAGYTGGGATGG	Forward	Wright
	melR1	CCTCTGGATTCAGGACCGTA	Reverse	Wright
Opsin	for3(mod)	TTCGAYAGATACAACGTRATCGTNAARGG	Forward	Almeida and Danforth 2009
	rev(mod)	ATANGGNGTCCANGCCATGAACCA	Reverse	Almeida and Danforth 2009
	OPforEuc	GATAGGTACAACGTAATCGTGAAA	Forward	Dorchin et al. 2017
	OPrevEuc	TGAACCACAGCGAGATCGTCATAA	Reverse	Dorchin et al. 2017
ArgK	For2	GACAGCAARTCTCTGCTGAAGAA	Forward	Magnacca and Danforth 2007
	Rev2	GGTYTTGGCATCGTTGTGGTAGATAC	Reverse	Magnacca and Danforth 2007
	melF2	TGTTCGATCARYYGAAGACG	Forward	Wright
	melR1	CGGTCACCCTCCTTGAAYAR	Reverse	Wright
	melR2	TCGTCRATCAACTTYTGCTG	Reverse	Wright
Primers with Wright as a reference were developed by the primary author for this study. Miller pers. comm. were developed by the second author for use on Embioptera.
